# Supplementary material
Source: publisher site journal article supplement (https://www.spandidos-publications.com/7817/downloadSupplementary)
Supplement: Supplementary file 1 [file downloadSupplementary]

Table SI. Upregulated genes in MDA-MB-231 cells supplemented with glucose 30 mmo/l.

| ID        | Genes    | Z score  |
|-----------|----------|----------|
| NM_032741 | AGPAT1   | 4.152511 |
| NM_003043 | SLC6A6   | 4.058222 |
| NM_005727 | TSPAN-1  | 3.811546 |
| NM_004189 | SOX14    | 3.648091 |
| NM_021625 | TRPV4    | 3.609894 |
| NM_016176 | SDF4     | 3.445534 |
| NM_006213 | PHKG1    | 3.320789 |
| NM_020649 | CBX8     | 3.251316 |
| NM_001252 | TNFSF7   | 3.129304 |
| NM_005919 | MEF2B    | 3.041269 |
| NM_002600 | PDE4B    | 3.035975 |
| NM_002150 | HPD      | 2.983852 |
| NM_014610 | GANAB    | 2.950495 |
| NM_017412 | FZD3     | 2.854118 |
| NM_003651 | CSDA     | 2.834342 |
| NM_000362 | TIMP3    | 2.799783 |
| NM_017774 | CDKAL1   | 2.733284 |
| NM_014176 | HSPC150  | 2.716715 |
| NM_016246 | DHRS10   | 2.699532 |
| NM_018221 | MOBK1B   | 2.687309 |
| NM_019027 | FLJ20273 | 2.672044 |
| NM_020399 | GOPC     | 2.663082 |
| NM_003690 | EIF2AK2  | 2.659061 |
| NM_024339 | MGC2655  | 2.651965 |
| NM_007369 | GPR161   | 2.648733 |
| NM_018309 | FLJ11046 | 2.638847 |
| NM_024080 | TRPM8    | 2.634975 |
| NM_021092 | PPY2     | 2.589445 |
| NM_006042 | HS3ST3A1 | 2.559936 |
| NM_019069 | WDR5B    | 2.554405 |
| NM_006090 | CEPT1    | 2.554112 |
| NM_000379 | XDH      | 2.553987 |
| NM_024317 | ILT10    | 2.543635 |
| NM_020039 | ACCN2    | 2.530103 |
| NM_003994 | KITLG    | 2.518938 |
| NM_020470 | YIF1     | 2.514873 |
| NM_017586 | CACFD1   | 2.500049 |
| NM_001657 | AREG     | 2.492902 |
| NM_004109 | FDX1     | 2.442675 |
| NM_057158 | DUSP4    | 2.4199   |
| NM_015392 | NPDC1    | 2.405947 |

|           |          |          |
|-----------|----------|----------|
| NM_004514 | FOXK2    | 2.393476 |
| NM_016527 | HAO2     | 2.39325  |
| NM_004381 | CREBL1   | 2.390443 |
| NM_001944 | DSG3     | 2.376546 |
| NM_001415 | EIF2S3   | 2.365719 |
| NM_005383 | NEU2     | 2.355715 |
| NM_005396 | PNLIPRP2 | 2.333905 |
| NM_012283 | KCNG2    | 2.332478 |
| NM_001017 | RPS13    | 2.32631  |
| NM_001861 | COX4I1   | 2.324682 |
| NM_016478 | NIPA     | 2.322902 |
| NM_002126 | HLF      | 2.322122 |
| NM_000176 | NR3C1    | 2.322036 |
| NM_003329 | TXN      | 2.314989 |
| NM_003292 | TPR      | 2.309161 |
| NM_024594 | PANK3    | 2.307944 |
| NM_003950 | F2RL3    | 2.30745  |
| NM_022909 | CENPH    | 2.304761 |
| NM_001021 | RPS17    | 2.288117 |
| NM_006385 | ZNF211   | 2.257072 |
| NM_022060 | ABHD4    | 2.253153 |
| NM_021798 | IL21R    | 2.24353  |
| NM_004809 | STOML1   | 2.243241 |
| NM_007066 | PKIG     | 2.238943 |
| NM_002873 | RAD17    | 2.237669 |
| NM_018667 | SMPD3    | 2.236902 |
| NM_006569 | CGREF1   | 2.234488 |
| NM_000606 | C8G      | 2.23265  |
| NM_023928 | AACS     | 2.231619 |
| NM_003330 | TXNRD1   | 2.229042 |
| NM_005486 | TOM1L1   | 2.224016 |
| NM_000665 | ACHE     | 2.215802 |
| NM_000396 | CTSK     | 2.215142 |
| NM_000414 | HSD17B4  | 2.211451 |
| NM_014945 | ABLIM3   | 2.208169 |
| NM_004631 | LRP8     | 2.200668 |
| NM_000871 | HTR6     | 2.199585 |
| NM_007227 | GPR45    | 2.196594 |
| NM_020362 | HT014    | 2.195962 |
| NM_000984 | RPL23A   | 2.189285 |
| NM_017805 | RASIP1   | 2.183886 |
| NM_003159 | CDKL5    | 2.176313 |
| NM_024971 | TRPM3    | 2.175485 |

|           |          |          |
|-----------|----------|----------|
| NM_033049 | MUC13    | 2.173363 |
| NM_017638 | FLJ20045 | 2.172362 |
| NM_003070 | SMARCA2  | 2.166094 |
| NM_024798 | SNX22    | 2.144619 |
| NM_001700 | AZU1     | 2.143836 |
| NM_012327 | PIGN     | 2.140758 |
| NM_000223 | KRT12    | 2.136065 |
| NM_005601 | NKG7     | 2.135613 |
| NM_006795 | EHD1     | 2.132918 |
| NM_000484 | APP      | 2.12283  |
| NM_002192 | INHBA    | 2.11029  |
| NM_016269 | LEF1     | 2.108639 |
| X63753    | SON      | 2.098167 |
| NM_012282 | KCNE1L   | 2.094914 |
| NM_000659 | AIRE     | 2.094801 |
| NM_020239 | SPEC1    | 2.091267 |
| NM_000842 | GRM5     | 2.07833  |
| NM_014069 | PSORS1C2 | 2.074568 |
| NM_003172 | SURF1    | 2.067239 |
| NM_025257 | SLC44A4  | 2.064433 |
| NM_004591 | CCL20    | 2.061356 |
| NM_001418 | EIF4G2   | 2.056268 |
| NM_012193 | FZD4     | 2.05576  |
| NM_000169 | GLA      | 2.055554 |
| NM_001365 | DLG4     | 2.052459 |
| BC014644  | HMG2     | 2.052074 |
| NM_006363 | SEC23B   | 2.041701 |
| NM_000196 | HSD11B2  | 2.041024 |
| X54315    | CDH2     | 2.04007  |
| NM_005543 | INSL3    | 2.03963  |
| NM_014826 | CDC42BPA | 2.038162 |
| NM_017515 | SLC35F2  | 2.03058  |
| NM_000386 | BLMH     | 2.023281 |
| NM_001839 | CNN3     | 2.017707 |
| NM_022451 | NOC3L    | 2.017077 |
| NM_013356 | SLC16A8  | 2.007846 |
| AF118083  | SEC10L1  | 2.007034 |
| AK001321  | HSPC133  | 2.005216 |
| NM_002478 | MYOD1    | 1.999414 |
| NM_017763 | FLJ20315 | 1.998798 |
| NM_003895 | SYNJ1    | 1.996071 |
| NM_004217 | AURKB    | 1.99504  |
| NM_022663 | CTAGE1   | 1.991679 |

|           |          |          |
|-----------|----------|----------|
| NM_016145 | PTD008   | 1.989167 |
| NM_015669 | PCDHB5   | 1.981639 |
| NM_006698 | BLCAP    | 1.979119 |
| NM_014175 | MRPL15   | 1.977463 |
| NM_000213 | ITGB4    | 1.974415 |
| NM_002141 | HOXA4    | 1.970863 |
| NM_016463 | CXXC5    | 1.970253 |
| NM_000577 | IL1RN    | 1.969516 |
| NM_000459 | TEK      | 1.969262 |
| NM_006868 | RAB31    | 1.967901 |
| NM_032510 | PAR6G    | 1.966775 |
| AB018284  | EIF5B    | 1.966763 |
| NM_003611 | OFD1     | 1.966498 |
| NM_004941 | DHX8     | 1.966337 |
| NM_020384 | CLDN2    | 1.964624 |
| NM_018404 | CENTA2   | 1.964308 |
| NM_005253 | FOSL2    | 1.960088 |
| NM_001511 | CXCL1    | 1.958781 |
| NM_001855 | COL15A1  | 1.958198 |
| AF116653  | FYB      | 1.958015 |
| NM_019018 | FLJ11127 | 1.952694 |
| NM_024048 | MGC3020  | 1.9522   |
| NM_024774 | FLJ21924 | 1.951839 |
| NM_004658 | RASAL1   | 1.946124 |
| NM_014723 | SNPH     | 1.942846 |
| NM_002426 | MMP12    | 1.935922 |
| NM_001440 | EXTL3    | 1.935858 |
| NM_002215 | ITIH1    | 1.935132 |
| NM_000126 | ETFA     | 1.935018 |
| NM_004520 | KIF2     | 1.933992 |
| NM_018264 | FLJ10900 | 1.928344 |
| NM_007015 | LECT1    | 1.9263   |
| X79563    | RPS21    | 1.926224 |
| NM_001054 | SULT1A2  | 1.9241   |
| NM_018272 | CASC1    | 1.911714 |
| NM_024658 | IPO4     | 1.910938 |
| NM_000651 | CR1      | 1.910302 |
| NM_024706 | FLJ13479 | 1.906299 |
| NM_014419 | DKKL1    | 1.905568 |
| NM_022469 | PRDC     | 1.900429 |
| NM_006244 | PPP2R5B  | 1.898831 |
| NM_002249 | KCNN3    | 1.894983 |
| NM_003121 | SPIB     | 1.894817 |

|           |          |          |
|-----------|----------|----------|
| NM_001006 | RPS3A    | 1.891832 |
| NM_013987 | PARK2    | 1.889553 |
| NM_004886 | APBA3    | 1.888261 |
| NM_004772 | C5orf13  | 1.878482 |
| NM_005322 | HIST1H1B | 1.874695 |
| NM_000695 | ALDH3B2  | 1.872978 |
| NM_012114 | CASP14   | 1.87013  |
| NM_004176 | SREBF1   | 1.868513 |
| NM_006840 | LILRB2   | 1.867937 |
| NM_007185 | CELF3    | 1.866878 |
| NM_000164 | GIPR     | 1.865121 |
| NM_006350 | FST      | 1.861719 |
| NM_006330 | LYPLA1   | 1.860534 |
| NM_002025 | FMR2     | 1.858723 |
| NM_000519 | HBD      | 1.854051 |
| NM_017849 | FLJ20507 | 1.848253 |
| NM_013959 | NRG1□1   | 1.846253 |
| NM_004292 | RIN1     | 1.844961 |
| NM_007235 | XPOT     | 1.843291 |
| NM_004750 | CRLF1    | 1.842846 |
| NM_001814 | CTSC     | 1.842508 |
| NM_005334 | HCFC1    | 1.842265 |
| NM_001866 | COX7B    | 1.841068 |
| NM_000121 | EPOR     | 1.838764 |
| NM_001747 | CAPG     | 1.836084 |
| NM_002300 | LDHB     | 1.835062 |
| NM_012189 | CABYR    | 1.834506 |
| NM_022898 | BCL11B   | 1.831971 |
| NM_002030 | FPRL2    | 1.829556 |
| NM_002136 | HNRNPA1  | 1.828958 |
| NM_004373 | COX6A1   | 1.828562 |
| NM_003223 | TFAP4    | 1.827935 |
| NM_001522 | GUCY2F   | 1.825566 |
| NM_002186 | IL9R     | 1.823523 |
| NM_005286 | GPR8     | 1.823496 |
| NM_016950 | SPOCK3   | 1.822851 |
| NM_003735 | PCDHGC3  | 1.820798 |
| NM_005096 | ZNF261   | 1.818155 |
| NM_003160 | AURKC    | 1.815072 |
| NM_003670 | BHLHB2   | 1.814162 |
| AF077951  | PIAS1    | 1.813667 |
| NM_004251 | RAB9A    | 1.812758 |
| NM_001523 | HAS1     | 1.811946 |

|           |            |          |
|-----------|------------|----------|
| NM_012182 | FOXB1      | 1.81054  |
| NM_016208 | VPS28      | 1.808185 |
| NM_003450 | ZNF174     | 1.807342 |
| NM_003772 | JRKL       | 1.805673 |
| NM_014309 | RBM9       | 1.802861 |
| NM_018176 | LGI2       | 1.802222 |
| NM_001114 | ADCY7      | 1.800851 |
| NM_024929 | AGPAT4-IT1 | 1.799113 |
| NM_018083 | ZNF358     | 1.798961 |
| NM_016562 | TLR7       | 1.794927 |
| NM_001670 | ARVCF      | 1.793571 |
| NM_004630 | SF1        | 1.793002 |
| NM_002273 | KRT8       | 1.788333 |
| NM_003593 | FOXN1      | 1.787685 |
| NM_012387 | PADI4      | 1.787391 |
| NM_020677 | HSCARG     | 1.786213 |
| NM_017540 | GALNT10    | 1.784957 |
| NM_001797 | CDH11      | 1.781802 |
| NM_001871 | CPB1       | 1.777845 |
| NM_024593 | FLJ11767   | 1.777626 |
| NM_022568 | ALDH8A1    | 1.777338 |
| NM_005069 | SIM2       | 1.777327 |
| NM_004047 | ATP6V0B    | 1.768043 |
| NM_018407 | LAPTM4B    | 1.767453 |
| NM_012423 | RPL13A     | 1.762085 |
| NM_012456 | TIMM10     | 1.76052  |
| NM_018027 | FRMD4      | 1.75756  |
| NM_024298 | MBOAT7     | 1.752931 |
| NM_000497 | CYP11B1    | 1.750652 |
| NM_002719 | PPP2R5C    | 1.750133 |
| NM_002831 | PTPN6      | 1.748339 |
| NM_002491 | NDUFB3     | 1.747329 |
| NM_005658 | TRAF1      | 1.743111 |
| NM_000896 | CYP4F3     | 1.741933 |
| NM_012126 | CHST5      | 1.738901 |
| NM_014909 | KIAA1036   | 1.738891 |
| NM_000269 | NME1       | 1.737701 |
| NM_005562 | LAMC2      | 1.737561 |
| NM_004224 | GPR50      | 1.736314 |
| NM_014245 | RNF7       | 1.734458 |
| NM_024899 | C18orf9    | 1.732665 |
| NM_004606 | TAF1       | 1.732278 |
| NM_000511 | FUT2       | 1.73225  |

|           |          |          |
|-----------|----------|----------|
| NM_018087 | FLJ10407 | 1.731735 |
| NM_005507 | CFL1     | 1.730403 |
| NM_000119 | EPB42    | 1.72738  |
| NM_022121 | PERP     | 1.727263 |
| NM_019008 | FLJ20232 | 1.724338 |
| NM_000741 | CHRM4    | 1.724197 |
| NM_004483 | GCSH     | 1.718466 |
| NM_003743 | NCOA1    | 1.71745  |
| NM_005103 | FEZ1     | 1.716293 |
| NM_006991 | ZNF197   | 1.71359  |
| NM_020158 | EXOSC5   | 1.712431 |
| NM_015559 | SETBP1   | 1.710634 |
| NM_002891 | RASGRF1  | 1.71046  |
| NM_003281 | TNNI1    | 1.70932  |
| NM_005677 | COLQ     | 1.707292 |
| NM_005420 | SULT1E1  | 1.707097 |
| NM_016272 | TOB2     | 1.705936 |
| NM_005340 | HINT1    | 1.705026 |
| NM_004050 | BCL2L2   | 1.704143 |
| NM_025114 | FLJ13615 | 1.703407 |
| NM_002568 | PABPC1   | 1.703144 |
| NM_004040 | RHOB     | 1.7027   |
| AF250309  | IL17RB   | 1.702271 |
| NM_020393 | PGLYRP4  | 1.700293 |
| NM_020356 | C20orf32 | 1.697122 |
| NM_001012 | RPS8     | 1.696091 |
| NM_015908 | ARS2     | 1.693225 |
| NM_020062 | SLC2A4RG | 1.692452 |
| NM_002648 | PIM1     | 1.690893 |
| NM_004927 | MRPL49   | 1.690075 |
| NM_006898 | HOXD3    | 1.68917  |
| NM_018477 | ACTR10   | 1.688867 |
| NM_001649 | APXL     | 1.688512 |
| NM_001386 | DPYSL2   | 1.686691 |
| NM_018086 | FIGN     | 1.683941 |
| NM_001450 | FHL2     | 1.683615 |
| NM_005427 | TP73     | 1.68074  |
| NM_000300 | PLA2G2A  | 1.67967  |
| NM_000810 | GABRA5   | 1.679495 |
| NM_017979 | SMAP-1   | 1.678788 |
| NM_005430 | WNT1     | 1.67741  |
| NM_022146 | GPR147   | 1.677234 |
| NM_048368 | CTDP1    | 1.677128 |

|           |          |          |
|-----------|----------|----------|
| NM_003181 | T        | 1.675109 |
| NM_007019 | UBE2C    | 1.675039 |
| NM_014286 | FREQ     | 1.674948 |
| BC009441  | 384D8-2  | 1.674232 |
| NM_002689 | POLA2    | 1.671008 |
| NM_005459 | GUCA1C   | 1.670853 |
| NM_002247 | KCNMA1   | 1.668941 |
| NM_014046 | MRPS18B  | 1.666364 |
| NM_019100 | DMAP1    | 1.665657 |
| NM_006364 | SEC23A   | 1.665553 |
| NM_023008 | FLJ12949 | 1.665519 |
| NM_000385 | AQP1     | 1.665364 |
| NM_003984 | SLC13A2  | 1.664388 |
| NM_007219 | RNF24    | 1.662955 |
| NM_024106 | ZNF426   | 1.662468 |
| NM_025079 | FLJ23231 | 1.661001 |
| NM_002948 | RPL15    | 1.660764 |
| NM_003262 | TLOC1    | 1.659234 |
| NM_019863 | F8       | 1.658864 |
| NM_020208 | SLC6A20  | 1.65813  |
| NM_025207 | PP591    | 1.657483 |
| NM_022061 | MRPL17   | 1.657255 |
| NM_000195 | HPS1     | 1.656781 |
| NM_014339 | IL17RA   | 1.652145 |
| NM_002442 | MSI1     | 1.650644 |
| NM_015971 | MRPS7    | 1.648913 |
| NM_006256 | PKN2     | 1.646925 |
| NM_024482 | GMEB1    | 1.646419 |
| NM_002199 | IRF2     | 1.644711 |
| NM_003132 | SRM      | 1.643256 |
| NM_016848 | SHC3     | 1.638919 |
| NM_000085 | CLCNKB   | 1.637431 |
| NM_001404 | EEF1G    | 1.635138 |
| NM_001940 | DRPLA    | 1.635098 |
| NM_001684 | ATP2B4   | 1.633295 |
| NM_023009 | MLP      | 1.629743 |
| NM_003588 | CUL4B    | 1.629489 |
| NM_003399 | XPNPEP2  | 1.629462 |
| NM_005539 | INPP5A   | 1.62831  |
| NM_000713 | BLVRB    | 1.627612 |
| NM_002693 | POLG     | 1.627094 |
| NM_001349 | DARS     | 1.626825 |
| NM_006118 | HAX1     | 1.625109 |

|           |          |          |
|-----------|----------|----------|
| NM_024919 | FRMD1    | 1.624595 |
| NM_000661 | RPL9     | 1.624149 |
| NM_014673 | KIAA0103 | 1.623388 |
| NM_013349 | SPUF     | 1.623244 |
| NM_001669 | ARSD     | 1.622112 |
| NM_017572 | MKNK2    | 1.618645 |
| NM_006206 | PDGFRA   | 1.618374 |
| NM_024044 | MGC5178  | 1.617002 |
| NM_000924 | PDE1B    | 1.616775 |
| NM_001504 | CXCR3    | 1.615267 |
| NM_000201 | ICAM1    | 1.613971 |
| NM_004422 | DVL2     | 1.612317 |
| NM_005608 | PTPRCAP  | 1.612129 |
| NM_006862 | TDRKH    | 1.611153 |
| NM_002599 | PDE2A    | 1.610389 |
| NM_002946 | RPA2     | 1.608762 |
| NM_000939 | POMC     | 1.608669 |
| NM_003451 | ZNF177   | 1.608284 |
| NM_003913 | PRPF4B   | 1.607051 |
| NM_004670 | PAPSS2   | 1.606068 |
| NM_004138 | KRTHA3A  | 1.60556  |
| NM_004892 | SEC22L1  | 1.605493 |
| NM_004055 | CAPN5    | 1.605423 |
| NM_001678 | ATP1B2   | 1.605202 |
| NM_002793 | PSMB1    | 1.602875 |
| BC016914  | ZCCHC4   | 1.601016 |
| NM_004992 | MECP2    | 1.600479 |
| NM_006113 | VAV3     | 1.600298 |
| NM_003926 | MBD3     | 1.598725 |
| NM_005538 | INHBC    | 1.597739 |
| NM_024954 | UBTD1    | 1.597646 |
| NM_002237 | KCNG1    | 1.596424 |
| NM_000051 | ATM      | 1.596333 |
| NM_005116 | SLC23A2  | 1.595225 |
| NM_000446 | PON1     | 1.592004 |
| NM_006593 | TBR1     | 1.591905 |
| NM_016183 | MRTO4    | 1.590776 |
| NM_001167 | XIAP     | 1.589565 |
| NM_018657 | MYNN     | 1.587673 |
| NM_013239 | PPP2R3B  | 1.587357 |
| NM_004235 | KLF4     | 1.5869   |
| NM_019096 | GTPBP2   | 1.584522 |
| NM_021734 | SLC25A19 | 1.583876 |

|           |              |          |
|-----------|--------------|----------|
| NM_001953 | ECGF1        | 1.582945 |
| NM_016327 | UPB1         | 1.582751 |
| NM_004221 | IL32         | 1.58252  |
| NM_006092 | CARD4        | 1.581887 |
| NM_001155 | ANXA6        | 1.581215 |
| NM_006053 | TCIRG1       | 1.580403 |
| NM_007350 | PHLDA1       | 1.579756 |
| NM_014386 | PKD2L2       | 1.577534 |
| NM_018303 | SEC5L1       | 1.576755 |
| NM_019006 | AWP1         | 1.575322 |
| NM_001891 | CSN2         | 1.574781 |
| NM_006979 | SLC39A7      | 1.573866 |
| NM_014365 | HSPB8        | 1.57164  |
| NM_005602 | CLDN11       | 1.570157 |
| NM_006344 | CLECSF14     | 1.568739 |
| NM_015987 | HEBP1        | 1.56862  |
| NM_002251 | KCNS1        | 1.567415 |
| NM_003190 | TAPBP        | 1.56624  |
| NM_006029 | PNMA1        | 1.565797 |
| NM_025164 | KIAA0999     | 1.564237 |
| NM_022752 | ZNF574       | 1.561486 |
| NM_018292 | QRSL1        | 1.561357 |
| NM_018674 | ACCN4        | 1.560612 |
| NM_033440 | ELA2A        | 1.560423 |
| NM_006659 | TUBGCP2      | 1.560006 |
| AF017999  | PTENP1       | 1.559703 |
| NM_021240 | DMRT3        | 1.559683 |
| NM_017856 | FLJ20514     | 1.555381 |
| NM_024669 | FLJ11795     | 1.555121 |
| NM_005973 | PRCC         | 1.554406 |
| NM_032977 | CASP10       | 1.553175 |
| NM_003137 | SRPK1        | 1.553072 |
| NM_002465 | MYBPC1       | 1.550081 |
| NM_018045 | FLJ10276     | 1.549791 |
| NM_001011 | RPS7         | 1.548999 |
| NM_023110 | FGFR1        | 1.546245 |
| NM_015523 | DKFZP566E144 | 1.54453  |
| NM_014916 | LMTK2        | 1.541687 |
| NM_014049 | ACAD9        | 1.540904 |
| NM_001166 | BIRC2        | 1.540261 |
| NM_016371 | HSD17B7      | 1.538481 |
| NM_002806 | PSMC6        | 1.535821 |
| NM_004771 | MMP20        | 1.534662 |

|           |            |          |
|-----------|------------|----------|
| NM_000970 | RPL6       | 1.533784 |
| NM_000128 | F11        | 1.532052 |
| NM_007105 | SLC22A18AS | 1.529368 |
| NM_006559 | KHDRBS1    | 1.528002 |
| NM_018159 | NUDT11     | 1.526875 |
| NM_005399 | PRKAB2     | 1.526308 |
| NM_012317 | LDOC1      | 1.522408 |
| NM_004044 | ATIC       | 1.52201  |
| NM_021724 | NR1D1      | 1.521959 |
| NM_001152 | SLC25A5    | 1.521808 |
| NM_001718 | BMP6       | 1.518205 |
| NM_005525 | HSD11B1    | 1.518062 |
| NM_007034 | DNAJB4     | 1.517566 |
| NM_018308 | ACOXL      | 1.517481 |
| NM_002255 | KIR2DL4    | 1.516534 |
| NM_001666 | ARHGAP4    | 1.516146 |
| NM_003893 | LDB1       | 1.515734 |
| NM_024841 | FLJ14213   | 1.514898 |
| NM_002250 | KCNN4      | 1.514173 |
| NM_005456 | MAPK8IP1   | 1.511294 |
| NM_015642 | ZNF288     | 1.510248 |
| NM_002923 | RGS2       | 1.51     |
| NM_013444 | UBQLN2     | 1.509303 |
| NM_016329 | SFMBT1     | 1.508811 |
| NM_016256 | NAGPA      | 1.506475 |
| NM_025256 | BAT8       | 1.503973 |
| NM_001554 | CYR61      | 1.503709 |

Table SII. Downregulated genes in MDA-MB-231 cells supplemented with glucose 30 mmo/l.

| ID        | Gene      | Z score   |
|-----------|-----------|-----------|
| NM_006544 | SEC10L1   | -4.523611 |
| NM_012261 | LAMP5     | -4.45501  |
| NM_012070 | ATRN      | -4.333672 |
| NM_004185 | WNT2B     | -3.908675 |
| NM_001697 | ATP5O     | -3.87772  |
| NM_053004 | FLJ21125  | -3.814458 |
| NM_003692 | TMEFF1    | -3.744839 |
| NM_006866 | LILRB1    | -3.717488 |
| NM_003072 | SMARCA4   | -3.709549 |
| NM_021176 | G6PC2     | -3.584369 |
| NM_004937 | CTNS      | -3.50955  |
| NM_004208 | PDCD8     | -3.506222 |
| NM_013335 | GMPPA     | -3.505725 |
| NM_017882 | CLN6      | -3.495366 |
| NM_022444 | SLC13A1   | -3.435806 |
| NM_001715 | BLK       | -3.398942 |
| NM_007106 | UBL3      | -3.393446 |
| NM_016041 | F-LANa    | -3.361821 |
| NM_015873 | VILL      | -3.295754 |
| NM_001745 | CAMLG     | -3.288471 |
| NM_018964 | SLC37A1   | -3.286311 |
| NM_007017 | SOX30     | -3.22295  |
| NM_004845 | PCYT1B    | -3.170543 |
| NM_015513 | CRELD1    | -3.146007 |
| NM_002306 | LGALS3    | -3.113501 |
| NM_018728 | MYO5C     | -3.112648 |
| NM_003149 | STAC      | -3.095065 |
| NM_017806 | FLJ20406  | -3.084884 |
| NM_004673 | ANGPTL1   | -3.076086 |
| NM_015995 | KLF13     | -3.075832 |
| NM_016567 | BCCIP     | -3.070832 |
| NM_018376 | NIPSNAP3B | -3.060472 |
| NM_024610 | HSPBAP1   | -3.025315 |
| NM_004334 | BST1      | -3.021358 |
| NM_002890 | RASA1     | -3.017049 |
| NM_001220 | CAMK2B    | -2.988002 |
| NM_022754 | SFXN1     | -2.95779  |
| NM_017664 | ANKRD10   | -2.954793 |
| NM_005402 | RALA      | -2.954746 |

|           |           |           |
|-----------|-----------|-----------|
| NM_007375 | TARDBP    | -2.951253 |
| NM_015024 | XPO7      | -2.94604  |
| NM_003857 | GALR2     | -2.930794 |
| NM_016161 | alpha4GnT | -2.92191  |
| NM_020806 | GPHN      | -2.921477 |
| NM_016571 | GLULD1    | -2.920741 |
| NM_006061 | CRISP3    | -2.912747 |
| NM_002453 | MTIF2     | -2.902438 |
| NM_005036 | PPARA     | -2.901704 |
| NM_022353 | OSGEPL1   | -2.876265 |
| NM_021940 | SMAP1     | -2.805632 |
| NM_012186 | FOXE3     | -2.794233 |
| NM_006849 | PDIP      | -2.789296 |
| NM_002451 | MTAP      | -2.77989  |
| NM_016032 | ZDHHC9    | -2.779021 |
| NM_001687 | ATP5D     | -2.734362 |
| NM_001076 | UGT2B15   | -2.726662 |
| NM_006663 | RAI       | -2.709763 |
| NM_004775 | B4GALT6   | -2.703608 |
| NM_015936 | CGI-04    | -2.700295 |
| NM_006149 | LGALS4    | -2.678721 |
| NM_002106 | H2AFZ     | -2.675801 |
| NM_014733 | ZFYVE16   | -2.673949 |
| NM_003774 | TUWD12    | -2.669652 |
| NM_020686 | ABAT      | -2.664048 |
| NM_016617 | UFM1      | -2.654499 |
| NM_025265 | SEN2L     | -2.652193 |
| NM_000859 | HMGCR     | -2.643579 |
| NM_003129 | SQLE      | -2.641703 |
| NM_017564 | STAB2     | -2.640344 |
| NM_006486 | FBLN1     | -2.633745 |
| NM_018155 | FLJ10618  | -2.633058 |
| NM_030567 | MGC10772  | -2.62823  |
| NM_024743 | FLJ21934  | -2.580673 |
| NM_003314 | TTC1      | -2.572704 |
| NM_006580 | CLDN16    | -2.561655 |
| NM_002307 | LGALS7    | -2.559873 |
| NM_006299 | ZNF193    | -2.551375 |
| NM_003635 | NDST2     | -2.550093 |
| NM_000375 | UROS      | -2.548124 |
| NM_024293 | RETREG2   | -2.544943 |

|           |          |           |
|-----------|----------|-----------|
| NM_000524 | HTR1A    | -2.544585 |
| NM_005180 | COMMD3   | -2.530102 |
| NM_003640 | IKBKAP   | -2.528404 |
| NM_020651 | PEL1     | -2.527371 |
| NM_002386 | MC1R     | -2.513108 |
| NM_012111 | AHSA1    | -2.510201 |
| NM_005981 | TSPAN31  | -2.509155 |
| NM_012071 | COMMD3   | -2.500792 |
| NM_015162 | BG1      | -2.4787   |
| NM_000901 | NR3C2    | -2.470241 |
| NM_005385 | NKTR     | -2.469805 |
| NM_005900 | SMAD1    | -2.46795  |
| NM_014366 | GNL      | -2.467313 |
| NM_002344 | LTK      | -2.458745 |
| NM_017777 | FLJ20345 | -2.456398 |
| NM_003480 | MFAP5    | -2.45139  |
| NM_003049 | SLC10A1  | -2.444602 |
| NM_000714 | BZRP     | -2.436886 |
| NM_018185 | DCUN1D2  | -2.434551 |
| NM_000252 | MTM1     | -2.429681 |
| NM_052966 | C1orf24  | -2.42802  |
| NM_017583 | TRIM44   | -2.427022 |
| NM_031848 | PCDHA2   | -2.423228 |
| NM_006751 | SSFA2    | -2.418871 |
| NM_004140 | LLGL1    | -2.418013 |
| NM_000944 | PPP3CA   | -2.415294 |
| NM_021247 | PRM3     | -2.404625 |
| NM_005899 | M17S2    | -2.388664 |
| NM_001975 | ENO2     | -2.386643 |
| NM_016570 | PTX1     | -2.377426 |
| NM_021174 | CCAR2    | -2.367923 |
| NM_013256 | ZNF180   | -2.359964 |
| NM_001507 | MLNR     | -2.355163 |
| NM_000522 | HOXA13   | -2.351932 |
| NM_018044 | WBSCR20A | -2.348268 |
| NM_002939 | RNH      | -2.345955 |
| NM_023919 | TAS2R7   | -2.338883 |
| NM_003491 | ARD1     | -2.337456 |
| NM_006437 | PARP4    | -2.333245 |
| NM_019596 | EPCIP1   | -2.330901 |
| NM_016072 | CGI-141  | -2.328791 |

|           |           |           |
|-----------|-----------|-----------|
| NM_024633 | C14orf139 | -2.327455 |
| NM_001997 | FAU       | -2.322459 |
| NM_018956 | SPACA9    | -2.316732 |
| NM_000589 | IL4       | -2.316614 |
| NM_006268 | DPF2      | -2.315601 |
| NM_006498 | LGALS2    | -2.313697 |
| NM_006672 | SLC22A7   | -2.311282 |
| NM_000289 | PFKM      | -2.310118 |
| NM_014232 | VAMP2     | -2.30758  |
| NM_006287 | TFPI      | -2.303166 |
| NM_014694 | ADAMSTL2  | -2.300051 |
| NM_014604 | TAX1BP3   | -2.286417 |
| NM_005687 | FARSLB    | -2.286186 |
| NM_020367 | PARP11    | -2.27847  |
| NM_012400 | PLA2G2D   | -2.275583 |
| NM_004607 | TBCA      | -2.273608 |
| NM_021938 | BRUNOL5   | -2.268466 |
| NM_018265 | FLJ10901  | -2.25837  |
| NM_017819 | RG9MTD1   | -2.256276 |
| NM_025238 | BTBD1     | -2.255508 |
| NM_003332 | TYROBP    | -2.252818 |
| NM_024854 | FLJ22028  | -2.252082 |
| NM_007249 | KLF12     | -2.249773 |
| NM_006704 | SUGT1     | -2.246407 |
| NM_022763 | FAD104    | -2.245315 |
| NM_018179 | ATF7IP    | -2.242636 |
| NM_016632 | LOC51326  | -2.242305 |
| NM_017413 | APLN      | -2.239679 |
| NM_014552 | TFCP2L2   | -2.238914 |
| NM_020469 | ABO       | -2.237779 |
| NM_014906 | PPM1E     | -2.235162 |
| NM_001704 | BAI3      | -2.231383 |
| NM_018038 | FLJ10246  | -2.228998 |
| NM_024422 | DSC2      | -2.221423 |
| NM_003467 | CXCR4     | -2.218547 |
| NM_012289 | KEAP1     | -2.21835  |
| NM_002756 | MAP2K3    | -2.21603  |
| NM_002170 | IFNA8     | -2.213902 |
| NM_024345 | MGC10765  | -2.210236 |
| NM_013961 | NRG1□3    | -2.203628 |
| NM_005912 | MC4R      | -2.202711 |

|           |          |           |
|-----------|----------|-----------|
| NM_006958 | ZNF16    | -2.201817 |
| NM_005258 | GCHFR    | -2.19877  |
| NM_012062 | DNM1L    | -2.197551 |
| NM_014011 | SOCS5    | -2.193443 |
| NM_004736 | XPR1     | -2.190901 |
| NM_006426 | DPYSL4   | -2.190599 |
| NM_012415 | RAD54B   | -2.187639 |
| NM_033000 | GTF2I    | -2.184372 |
| NM_024526 | EPS8L3   | -2.182996 |
| NM_020152 | MAP3K7CL | -2.182271 |
| NM_021833 | UCP1     | -2.180627 |
| NM_012256 | ZNF212   | -2.176949 |
| NM_014871 | USP52    | -2.174308 |
| NM_000438 | PAX3     | -2.173731 |
| NM_018934 | PCDHB14  | -2.170148 |
| NM_018271 | FLJ10916 | -2.169724 |
| NM_000250 | MPO      | -2.169648 |
| NM_021992 | TMSNB    | -2.164318 |
| NM_015915 | SPG3A    | -2.16397  |
| NM_021199 | SQRDL    | -2.160673 |
| NM_000596 | IGFBP1   | -2.158544 |
| NM_005830 | MRPS31   | -2.153276 |
| NM_016730 | FOLR1    | -2.149811 |
| NM_000538 | RFXAP    | -2.145427 |
| NM_021570 | BARX1    | -2.142496 |
| NM_004953 | EIF4G1   | -2.140136 |
| NM_021930 | RINT-1   | -2.131554 |
| NM_022483 | FLJ21657 | -2.129244 |
| NM_000364 | TNNT2    | -2.125573 |
| NM_016195 | MPHOSPH1 | -2.125168 |
| NM_000117 | EMD      | -2.122585 |
| NM_018013 | FLJ10159 | -2.116808 |
| NM_004808 | NMT2     | -2.115438 |
| NM_002906 | RDX      | -2.114283 |
| BC000675  | FLJ20542 | -2.113759 |
| NM_000111 | SLC26A3  | -2.110219 |
| NM_017705 | MPRG     | -2.106774 |
| NM_017691 | FLJ20156 | -2.105025 |
| NM_004419 | DUSP5    | -2.104856 |
| NM_024604 | FLJ21908 | -2.102997 |
| NM_018835 | MNAB     | -2.101949 |

|           |          |           |
|-----------|----------|-----------|
| NM_030881 | DDX17    | -2.101812 |
| NM_001766 | CD1D     | -2.101381 |
| NM_003982 | SLC7A7   | -2.100064 |
| NM_006615 | CAPN9    | -2.096706 |
| NM_001935 | DPP4     | -2.095365 |
| NM_001157 | ANXA11   | -2.095357 |
| NM_000890 | KCNJ5    | -2.091384 |
| NM_002436 | MPP1     | -2.090193 |
| NM_014382 | ATP2C1   | -2.082779 |
| NM_021822 | APOBEC3G | -2.077992 |
| NM_004196 | CDKL1    | -2.076821 |
| NM_002268 | KPNA4    | -2.070344 |
| NM_013980 | BNIP1    | -2.069962 |
| NM_001785 | CDA      | -2.069872 |
| NM_004575 | POU4F2   | -2.068853 |
| NM_024603 | FLJ11588 | -2.064536 |
| NM_006919 | SERPINB3 | -2.058348 |
| NM_006627 | POP4     | -2.058304 |
| NM_000406 | GNRHR    | -2.057157 |
| NM_006319 | CDIPT    | -2.056805 |
| NM_004785 | SLC9A3R2 | -2.056796 |
| NM_012465 | TLL2     | -2.056532 |
| NM_016052 | CGI-115  | -2.055756 |
| NM_024027 | COLEC11  | -2.052564 |
| NM_014517 | UBP1     | -2.049218 |
| NM_025188 | TRIM45   | -2.042476 |
| NM_014580 | SLC2A8   | -2.041188 |
| NM_005639 | SYT1     | -2.037838 |
| NM_058248 | DLAD     | -2.037629 |
| NM_006746 | SCML1    | -2.037371 |
| NM_002402 | MEST     | -2.025544 |
| NM_024928 | OBFC1    | -2.02467  |
| NM_014182 | ORMDL2   | -2.024077 |
| NM_000305 | PON2     | -2.019058 |
| NM_013936 | OR12D2   | -2.017387 |
| NM_022734 | FLJ20859 | -2.014316 |
| NM_006349 | ZNHIT1   | -2.005258 |
| NM_004081 | DAZ4     | -2.005168 |
| NM_004161 | RAB1A    | -2.004442 |
| NM_020530 | OSM      | -2.003139 |
| NM_004936 | CDKN2B   | -2.001421 |

|           |                |           |
|-----------|----------------|-----------|
| NM_001240 | CCNT1          | -2.000505 |
| NM_017770 | ELOVL2         | -1.999432 |
| NM_003925 | MBD4           | -1.998611 |
| NM_003813 | ADAM21         | -1.997334 |
| NM_006770 | MARCO          | -1.997304 |
| NM_003337 | UBE2B          | -1.996791 |
| NM_002594 | PCSK2          | -1.995705 |
| NM_001200 | BMP2           | -1.991672 |
| NM_030969 | TMEM14B        | -1.989995 |
| NM_004156 | PPP2CB         | -1.988111 |
| NM_025155 | FLJ11848       | -1.984983 |
| NM_015836 | WARS2          | -1.984661 |
| NM_015965 | NDUFA13/GRIM19 | -1.982831 |
| BC015714  | BHC80          | -1.978846 |
| NM_018723 | A2BP1          | -1.978569 |
| NM_002914 | RFC2           | -1.977969 |
| NM_023915 | GPR87          | -1.977395 |
| NM_018930 | PCDHB10        | -1.974744 |
| NM_022972 | FGFR2          | -1.973197 |
| NM_014596 | ZNRD1          | -1.969404 |
| NM_016817 | OAS2           | -1.969157 |
| NM_022826 | AXOT           | -1.96758  |
| NM_004612 | TGFBR1         | -1.967573 |
| M64486    | CALCA          | -1.96643  |
| NM_006200 | PCSK5          | -1.959996 |
| NM_024722 | ACBD4          | -1.957771 |
| NM_012162 | FBXL6          | -1.957499 |
| NM_001307 | GABARAP        | -1.957149 |
| NM_023038 | ADAM19         | -1.956913 |
| NM_017748 | FLJ20291       | -1.956854 |
| NM_003250 | THRA           | -1.955754 |
| NM_002526 | NT5E           | -1.955565 |
| NM_003376 | VEGFA          | -1.952582 |
| NM_016101 | CGI-37         | -1.951769 |
| NM_013363 | PCOLCE2        | -1.942086 |
| NM_017854 | FLJ20512       | -1.941762 |
| BC001804  | BZW1           | -1.937094 |
| NM_004037 | AMPD2          | -1.936943 |
| NM_005598 | NHLH1          | -1.936577 |
| NM_001175 | ARHGDIB        | -1.935097 |
| NM_002063 | GLRA2          | -1.933551 |

|           |           |           |
|-----------|-----------|-----------|
| NM_006080 | SEMA3A    | -1.931633 |
| NM_017924 | C14orf119 | -1.929801 |
| NM_018103 | LRRC5     | -1.929476 |
| NM_007278 | GABARAP   | -1.928091 |
| NM_014793 | LCMT2     | -1.926923 |
| NM_004711 | SYNGR1    | -1.926247 |
| NM_006821 | ZAP128    | -1.925282 |
| NM_003104 | SORD      | -1.924986 |
| AL117397  | RAPGEF2   | -1.922911 |
| NM_002928 | RGS16     | -1.92272  |
| NM_014946 | SPG4      | -1.919573 |
| NM_005798 | RFP2      | -1.919167 |
| NM_006339 | HMG20B    | -1.915695 |
| NM_001936 | DPP6      | -1.912295 |
| NM_005674 | ZNF239    | -1.911154 |
| NM_006733 | FSHPRH1   | -1.910197 |
| NM_021571 | ICEBERG   | -1.909647 |
| NM_020377 | CYSLTR2   | -1.909319 |
| NM_014211 | GABRP     | -1.908305 |
| NM_014292 | CBX6      | -1.902739 |
| NM_015932 | POMP      | -1.902089 |
| NM_018121 | SLF2      | -1.900917 |
| NM_013233 | STK39     | -1.90085  |
| NM_020244 | CHPT1     | -1.898903 |
| NM_005259 | GDF8      | -1.896736 |
| NM_024514 | CYP2R1    | -1.894849 |
| NM_005010 | NRCAM     | -1.894691 |
| NM_054022 | GOSR2     | -1.892145 |
| NM_014489 | FRAG1     | -1.891426 |
| NM_019591 | ZNF26     | -1.891183 |
| NM_058216 | RAD51C    | -1.888566 |
| NM_016050 | MRPL11    | -1.888032 |
| NM_000978 | RPL23     | -1.887431 |
| NM_006814 | PSMF1     | -1.885362 |
| NM_006621 | AHCYL1    | -1.88367  |
| NM_003143 | SSBP1     | -1.88287  |
| NM_000264 | PTCH      | -1.88168  |
| NM_020644 | C11orf15  | -1.877984 |
| NM_003242 | TGFBR2    | -1.877097 |
| NM_005417 | SRC       | -1.873412 |
| NM_004891 | MRPL33    | -1.873271 |

|           |           |           |
|-----------|-----------|-----------|
| NM_003795 | SNX3      | -1.872107 |
| NM_003668 | MAPKAPK5  | -1.87191  |
| NM_015571 | SENP6     | -1.871823 |
| NM_002629 | PGAM1     | -1.871793 |
| NM_021188 | ZNF410    | -1.87141  |
| NM_001423 | EMP1      | -1.86716  |
| NM_000330 | RS1       | -1.864458 |
| NM_002397 | MEF2C     | -1.864314 |
| NM_004805 | POLR2D    | -1.862817 |
| NM_001481 | C16orf3   | -1.861987 |
| NM_006449 | CDC42EP3  | -1.858886 |
| NM_016470 | C20orf111 | -1.858854 |
| NM_002573 | PAFAH1B3  | -1.857952 |
| NM_003567 | BCAR3     | -1.857505 |
| NM_019064 | SDK2      | -1.855433 |
| NM_002383 | MAZ       | -1.855098 |
| NM_020149 | MEIS2     | -1.854405 |
| NM_025144 | LAK       | -1.851929 |
| NM_003452 | ZNF189    | -1.851618 |
| NM_000841 | GRM4      | -1.850621 |
| NM_006494 | ERF       | -1.849494 |
| NM_018349 | FLJ11175  | -1.84885  |
| NM_002580 | PAP       | -1.846908 |
| NM_017708 | FLJ20200  | -1.846211 |
| NM_002895 | RBL1      | -1.843022 |
| NM_004323 | BAG1      | -1.842771 |
| NM_021080 | DAB1      | -1.839855 |
| NM_016944 | TAS2R4    | -1.83853  |
| NM_018488 | TBX4      | -1.833993 |
| NM_006778 | TRIM10    | -1.832358 |
| NM_023112 | OTUB2     | -1.832059 |
| NM_018183 | SBNO1     | -1.831283 |
| NM_000257 | MYH7      | -1.830588 |
| NM_007043 | HRB2      | -1.829552 |
| NM_012240 | SIRT4     | -1.82793  |
| NM_012100 | DNPEP     | -1.827868 |
| NM_015946 | PELO      | -1.8247   |
| NM_017902 | HIF1AN    | -1.824047 |
| NM_016820 | OGG1      | -1.82353  |
| NM_012453 | TBL2      | -1.823011 |
| NM_013323 | SNX11     | -1.821591 |

|           |               |           |
|-----------|---------------|-----------|
| NM_000956 | PTGER2        | -1.819846 |
| NM_015544 | DKFZP564K1964 | -1.819263 |
| NM_002398 | MEIS1         | -1.816341 |
| NM_006738 | AKAP13        | -1.813537 |
| NM_032993 | NOLA1         | -1.813041 |
| NM_002553 | ORC5L         | -1.809141 |
| NM_002165 | ID1           | -1.808813 |
| NM_015948 | SLC35B3       | -1.808562 |
| NM_017660 | GATAD2A       | -1.806845 |
| NM_000480 | AMPD3         | -1.800875 |
| NM_022838 | FLJ12969      | -1.799854 |
| NM_001881 | CREM          | -1.798406 |
| NM_004622 | TSN           | -1.798157 |
| NM_021252 | RAB18         | -1.791088 |
| NM_030569 | ITIH5         | -1.790494 |
| NM_012269 | HYAL4         | -1.790002 |
| NM_017424 | ADA2          | -1.787956 |
| NM_016557 | CCRL1         | -1.787341 |
| NM_016085 | ATRAID        | -1.787083 |
| NM_021185 | CATSPERG      | -1.785781 |
| NM_003044 | SLC6A12       | -1.783841 |
| NM_002019 | FLT1          | -1.782062 |
| NM_017915 | FLJ20641      | -1.781189 |
| NM_019009 | TOLLIP        | -1.778063 |
| NM_024659 | GTDC1         | -1.777343 |
| NM_014043 | DKFZP564O123  | -1.776655 |
| NM_006915 | RP2           | -1.77641  |
| NM_018894 | EFEMP1        | -1.776096 |
| NM_003910 | G10           | -1.774037 |
| NM_000729 | CCK           | -1.774013 |
| NM_006468 | POLR3C        | -1.772774 |
| NM_003764 | STX11         | -1.77266  |
| NM_006610 | MASP2         | -1.769089 |
| NM_018009 | TAPBPL        | -1.768801 |
| NM_018833 | TAP2          | -1.766883 |
| NM_024920 | DNAJB14       | -1.763717 |
| NM_017555 | EGLN2         | -1.762393 |
| NM_002345 | LUM           | -1.760915 |
| NM_013960 | NRG1          | -1.759087 |
| NM_018340 | FLJ11151      | -1.75543  |
| NM_015472 | TAZ           | -1.754069 |

|           |          |           |
|-----------|----------|-----------|
| NM_004179 | TPH1     | -1.754055 |
| NM_001351 | DAZL     | -1.753847 |
| NM_013278 | IL17C    | -1.753329 |
| NM_018307 | RHOT1    | -1.753304 |
| NM_014475 | DHDH     | -1.753139 |
| NM_031200 | CCR9     | -1.751191 |
| NM_004294 | MTRF1    | -1.749354 |
| NM_007238 | PXMP4    | -1.746817 |
| NM_014000 | VCL      | -1.746181 |
| NM_013401 | RAB3IL1  | -1.745978 |
| NM_004186 | SEMA3F   | -1.744181 |
| NM_003652 | CPZ      | -1.743368 |
| NM_017654 | C7orf5   | -1.739921 |
| NM_016565 | E2IG2    | -1.739807 |
| NM_013377 | PDZRN4   | -1.738641 |
| NM_018267 | H2AFJ    | -1.73833  |
| NM_004567 | PFKFB4   | -1.735636 |
| NM_001911 | CTSG     | -1.734356 |
| NM_004894 | C14orf2  | -1.731707 |
| NM_006671 | SLC1A7   | -1.730613 |
| NM_016531 | KLF3     | -1.728467 |
| NM_014335 | CRI1     | -1.728248 |
| NM_033220 | TRIM14   | -1.728215 |
| NM_001285 | CLCA1    | -1.7271   |
| NM_015922 | NSDHL    | -1.726351 |
| AF000936  | SH3BP2   | -1.725899 |
| NM_016366 | CABP2    | -1.725323 |
| NM_018010 | ESRRBL1  | -1.724809 |
| NM_002828 | PTPN2    | -1.723934 |
| NM_014174 | THY28    | -1.722649 |
| NM_006838 | METAP2   | -1.72169  |
| NM_001260 | CDK8     | -1.721165 |
| NM_006264 | PTPN13   | -1.720708 |
| NM_003971 | SPAG9    | -1.719708 |
| NM_013396 | USP25    | -1.719103 |
| NM_006022 | TGFB1I4  | -1.718868 |
| NM_002055 | GFAP     | -1.718828 |
| NM_006270 | RRAS     | -1.717753 |
| NM_012319 | SLC39A6  | -1.715457 |
| NM_005177 | ATP6V0A1 | -1.710967 |
| NM_001788 | CDC10    | -1.710702 |

|           |           |           |
|-----------|-----------|-----------|
| NM_002216 | ITIH2     | -1.709664 |
| NM_018491 | CBWD2     | -1.707025 |
| NM_003981 | PRC1      | -1.705788 |
| NM_005662 | VDAC3     | -1.704799 |
| NM_016418 | NF2       | -1.70428  |
| NM_007098 | CLTCL1    | -1.700383 |
| NM_006441 | MTHFS     | -1.699733 |
| NM_019093 | UGT1A10   | -1.699534 |
| NM_005557 | KRT16     | -1.699278 |
| NM_004330 | BNIP2     | -1.698903 |
| NM_016630 | SPG21     | -1.698798 |
| NM_014332 | SMPX      | -1.698345 |
| NM_005461 | MAFB      | -1.696761 |
| NM_012321 | LSM4      | -1.696665 |
| NM_002074 | GNB1      | -1.69623  |
| NM_000709 | BCKDHA    | -1.696072 |
| NM_012201 | GLG1      | -1.695835 |
| NM_014300 | SPC18     | -1.69517  |
| NM_021994 | ZNF277    | -1.69362  |
| NM_014235 | UBL4      | -1.692618 |
| NM_003943 | GENX-3414 | -1.692087 |
| NM_018387 | STRBP     | -1.686523 |
| NM_024642 | GALNT12   | -1.686077 |
| NM_014308 | PIK3R5    | -1.684939 |
| NM_013238 | DNAJD1    | -1.682099 |
| NM_013243 | SCG3      | -1.681625 |
| NM_006017 | PROM1     | -1.68151  |
| NM_016240 | SCARA3    | -1.680933 |
| NM_000204 | IF        | -1.680855 |
| NM_002991 | CCL24     | -1.679528 |
| NM_024671 | FLJ23436  | -1.678254 |
| NM_021572 | ENPP5     | -1.677763 |
| NM_018319 | TDPI      | -1.675226 |
| NM_004702 | CCNE2     | -1.675225 |
| NM_003371 | VAV2      | -1.675109 |
| NM_014869 | KIAA0763  | -1.674794 |
| NM_015364 | LY96      | -1.672373 |
| NM_004362 | CLGN      | -1.671166 |
| NM_032264 | AE2       | -1.669747 |
| NM_024037 | MGC2603   | -1.668561 |
| NM_017631 | FLJ20035  | -1.666824 |

|           |           |           |
|-----------|-----------|-----------|
| NM_016836 | RBMS1     | -1.661973 |
| NM_016525 | UBAP1     | -1.661113 |
| NM_005714 | KCNK7     | -1.658195 |
| NM_004286 | GTPBP1    | -1.657859 |
| NM_001197 | BIK       | -1.655405 |
| NM_000140 | FECH      | -1.654895 |
| NM_014835 | OSBPL2    | -1.654796 |
| NM_017633 | C6orf37   | -1.65383  |
| NM_000894 | LHB       | -1.653574 |
| NM_006754 | SYPL      | -1.653053 |
| NM_006811 | TDE1      | -1.652232 |
| NM_016568 | SALPR     | -1.652001 |
| NM_001533 | HNRPL     | -1.651671 |
| NM_005156 | ROD1      | -1.650277 |
| AB030648  | FGF20     | -1.648947 |
| NM_016510 | SCLY      | -1.648914 |
| NM_019595 | ITSN2     | -1.648205 |
| NM_004505 | USP6      | -1.647718 |
| NM_001864 | COX7A1    | -1.645172 |
| NM_003475 | RASSF7    | -1.645051 |
| NM_017767 | SLC39A4   | -1.643563 |
| NM_015945 | SLC35C2   | -1.643429 |
| NM_000424 | KRT5      | -1.642944 |
| NM_018168 | C14orf105 | -1.642735 |
| NM_000689 | ALDH1A1   | -1.642594 |
| NM_004278 | PIGL      | -1.641587 |
| NM_024309 | TNIP2     | -1.641495 |
| NM_003463 | PTP4A1    | -1.639551 |
| NM_015387 | PREI3     | -1.639213 |
| NM_003600 | STK6      | -1.638378 |
| NM_016732 | RALY      | -1.637923 |
| NM_014633 | SH2BP1    | -1.6376   |
| NM_003084 | SNAPC3    | -1.633607 |
| NM_020147 | THAP10    | -1.632665 |
| NM_021732 | AVPI1     | -1.631231 |
| NM_004517 | ILK       | -1.630166 |
| NM_025137 | FLJ21439  | -1.628288 |
| NM_024665 | IRA1      | -1.624757 |
| L34093    | HLA-DQA1  | -1.624561 |
| NM_001870 | CPA3      | -1.624545 |
| NM_004434 | EML1      | -1.624308 |

|           |          |           |
|-----------|----------|-----------|
| NM_001641 | APEX1    | -1.624101 |
| NM_002993 | CXCL6    | -1.623144 |
| NM_000545 | HNF1A    | -1.623111 |
| AF155096  | FNBP3    | -1.6219   |
| NM_014707 | HDAC9    | -1.621832 |
| NM_018294 | CWF19L1  | -1.619188 |
| NM_012449 | STEAP1   | -1.616722 |
| NM_002945 | RPA1     | -1.616098 |
| NM_004267 | CHST2    | -1.615904 |
| NM_015718 | NOX3     | -1.614905 |
| NM_000821 | GGCX     | -1.614349 |
| NM_003550 | MAD1L1   | -1.614175 |
| NM_024761 | MOBKL2B  | -1.610118 |
| NM_005761 | PLXNC1   | -1.609057 |
| NM_021230 | MLL3     | -1.608771 |
| NM_004547 | NDUFB4   | -1.608449 |
| NM_014385 | SIGLEC7  | -1.606702 |
| NM_004756 | NUMBL    | -1.602922 |
| NM_000634 | CXCR2    | -1.602307 |
| NM_017936 | KIAA2010 | -1.600192 |
| NM_012097 | ARL5     | -1.596794 |
| NM_000678 | ADRA1D   | -1.595186 |
| NM_017677 | MTMR8    | -1.591884 |
| NM_004824 | CDYL     | -1.588419 |
| NM_021139 | UGT2B4   | -1.587727 |
| NM_005767 | P2RY5    | -1.587431 |
| NM_002504 | NFX1     | -1.586059 |
| NM_001165 | BIRC3    | -1.585942 |
| NM_007007 | CPSF6    | -1.584462 |
| NM_003384 | VRK1     | -1.58298  |
| NM_004181 | UCHL1    | -1.582169 |
| NM_002469 | MYF6     | -1.581417 |
| NM_004708 | PDCD5    | -1.581238 |
| NM_013257 | SGKL     | -1.580533 |
| NM_002342 | LTBR     | -1.579657 |
| NM_005621 | S100A12  | -1.578369 |
| NM_014283 | C1orf9   | -1.577909 |
| NM_021729 | VPS11    | -1.57644  |
| NM_006120 | HLA-DMA  | -1.572151 |
| NM_003248 | THBS4    | -1.569593 |
| NM_000161 | GCH1     | -1.569469 |

|           |          |           |
|-----------|----------|-----------|
| NM_020386 | PLAAT1   | -1.569247 |
| NM_024006 | VKORC1   | -1.56817  |
| NM_006221 | UBL5     | -1.566698 |
| NM_006466 | POLR3F   | -1.565949 |
| NM_003126 | SPTA1    | -1.565558 |
| NM_024051 | GGCT     | -1.564788 |
| NM_006848 | DIPA     | -1.561106 |
| NM_004352 | CBLN1    | -1.561068 |
| NM_005996 | TBX3     | -1.55924  |
| NM_012296 | GAB2     | -1.558028 |
| NM_003766 | BECN1    | -1.555481 |
| NM_006443 | DNPH1    | -1.554546 |
| NM_006841 | SLC38A3  | -1.552541 |
| NM_001316 | CSE1L    | -1.552524 |
| NM_004811 | LPXN     | -1.552189 |
| NM_003117 | SPAM1    | -1.551654 |
| NM_013940 | OR10H1   | -1.549784 |
| NM_005851 | DOC-1R   | -1.548257 |
| NM_002267 | KPNA3    | -1.54727  |
| NM_001104 | ACTN3    | -1.546799 |
| NM_018593 | SLC16A10 | -1.546743 |
| NM_006753 | SURF6    | -1.54672  |
| NM_014050 | MRPL42   | -1.546418 |
| NM_020133 | AGPAT4   | -1.546259 |
| NM_020428 | SLC44A2  | -1.54468  |
| NM_002544 | OMG      | -1.543671 |
| NM_001605 | AARS     | -1.542761 |
| NM_015425 | POLR1A   | -1.540349 |
| NM_005049 | PWP2H    | -1.537942 |
| NM_018455 | BM039    | -1.537523 |
| NM_004827 | ABCG2    | -1.536559 |
| NM_002257 | KLK1     | -1.535657 |
| NM_001156 | ANXA7    | -1.535525 |
| NM_007216 | HPS5     | -1.53504  |
| NM_004477 | FRG1     | -1.533148 |
| NM_005618 | DLL1     | -1.530866 |
| NM_001146 | ANGPT1   | -1.530761 |
| NM_005969 | NAP1L4   | -1.529292 |
| NM_002646 | PIK3C2B  | -1.529167 |
| NM_004938 | DAPK1    | -1.528632 |
| NM_003447 | ZNF165   | -1.526387 |

|           |          |           |
|-----------|----------|-----------|
| NM_005845 | ABCC4    | -1.526252 |
| NM_013410 | AK3      | -1.524687 |
| NM_005733 | KIF20A   | -1.521043 |
| NM_022338 | C11orf24 | -1.52073  |
| NM_014766 | SCRN1    | -1.520279 |
| NM_021071 | ARTA4    | -1.516872 |
| NM_021648 | TSPYL4   | -1.516437 |
| NM_000738 | CHRM1    | -1.515676 |
| NM_002875 | RAD51    | -1.514849 |
| NM_012285 | KCNH4    | -1.514651 |
| NM_018321 | BRIX     | -1.514617 |
| NM_017615 | NSMCE4A  | -1.513144 |
| NM_006358 | SLC25A17 | -1.512951 |
| NM_022917 | NOL6     | -1.512392 |
| NM_004212 | SLC28A2  | -1.51172  |
| NM_016536 | ZNF571   | -1.510976 |
| NM_006564 | CXCR6    | -1.510565 |
| NM_002212 | EIF6     | -1.510429 |
| NM_014320 | HEBP2    | -1.509111 |
| NM_007272 | CTRC     | -1.508941 |
| NM_013439 | PILRA    | -1.507821 |
| NM_022044 | SDF2L1   | -1.507393 |
| NM_005220 | DLX3     | -1.50546  |
| NM_013260 | HCNGP    | -1.503853 |
| NM_014303 | PES1     | -1.501741 |
| NM_004875 | POLR1C   | -1.501699 |
| NM_015910 | LOC51057 | -1.50058  |
